# Supplementary material for: Lactobacillus Intestinalis Primes Epithelial Cells to Suppress Colitis‐Related Th17 Response by Host‐Microbe Retinoic Acid Biosynthesis
Source: PubMed Central journal article supplement (PMC10754072; doi:10.1002/advs.202303457), 2023-11-20
Supplement: ADVS-10-2303457-s001.pdf [file ADVS-10-2303457-s001.pdf]

# ADVANCED SCIENCE

Open Access

## Supporting Information

for *Adv. Sci.*, DOI 10.1002/adv.202303457

*Lactobacillus Intestinalis* Primes Epithelial Cells to Suppress Colitis-Related Th17 Response by Host-Microbe Retinoic Acid Biosynthesis

Qi-Wen Wang, Ding-Jia-Cheng Jia, Jia-Min He, Yong Sun, Yun Qian, Qi-Wei Ge, Ya-Dong Qi, Qing-Yi Wang, Ying-Ying Hu, Lan Wang, Yan-Fei Fang, Hui-Qin He, Man Luo, Li-Jun Feng, Jian-Min Si, Zhang-Fa Song\*, Liang-Jing Wang\* and Shu-Jie Chen\*

## Supporting Information

### ***L. intestinalis* primes epithelial cells to suppress colitis-related Th17 response by host-microbe retinoic acid biosynthesis**

*Qi-Wen Wang, Ding-Jia-Cheng Jia, Jia-Min He, Yong Sun, Yun Qian, Qi-Wei Ge, Ya-Dong Qi, Qing-Yi Wang, Ying-Ying Hu, Lan Wang, Yan-Fei Fang, Hui-Qin He, Man Luo, Li-Jun Feng, Jian-Min Si, Zhang-Fa Song, Liang-Jing Wang, Shu-Jie Chen*

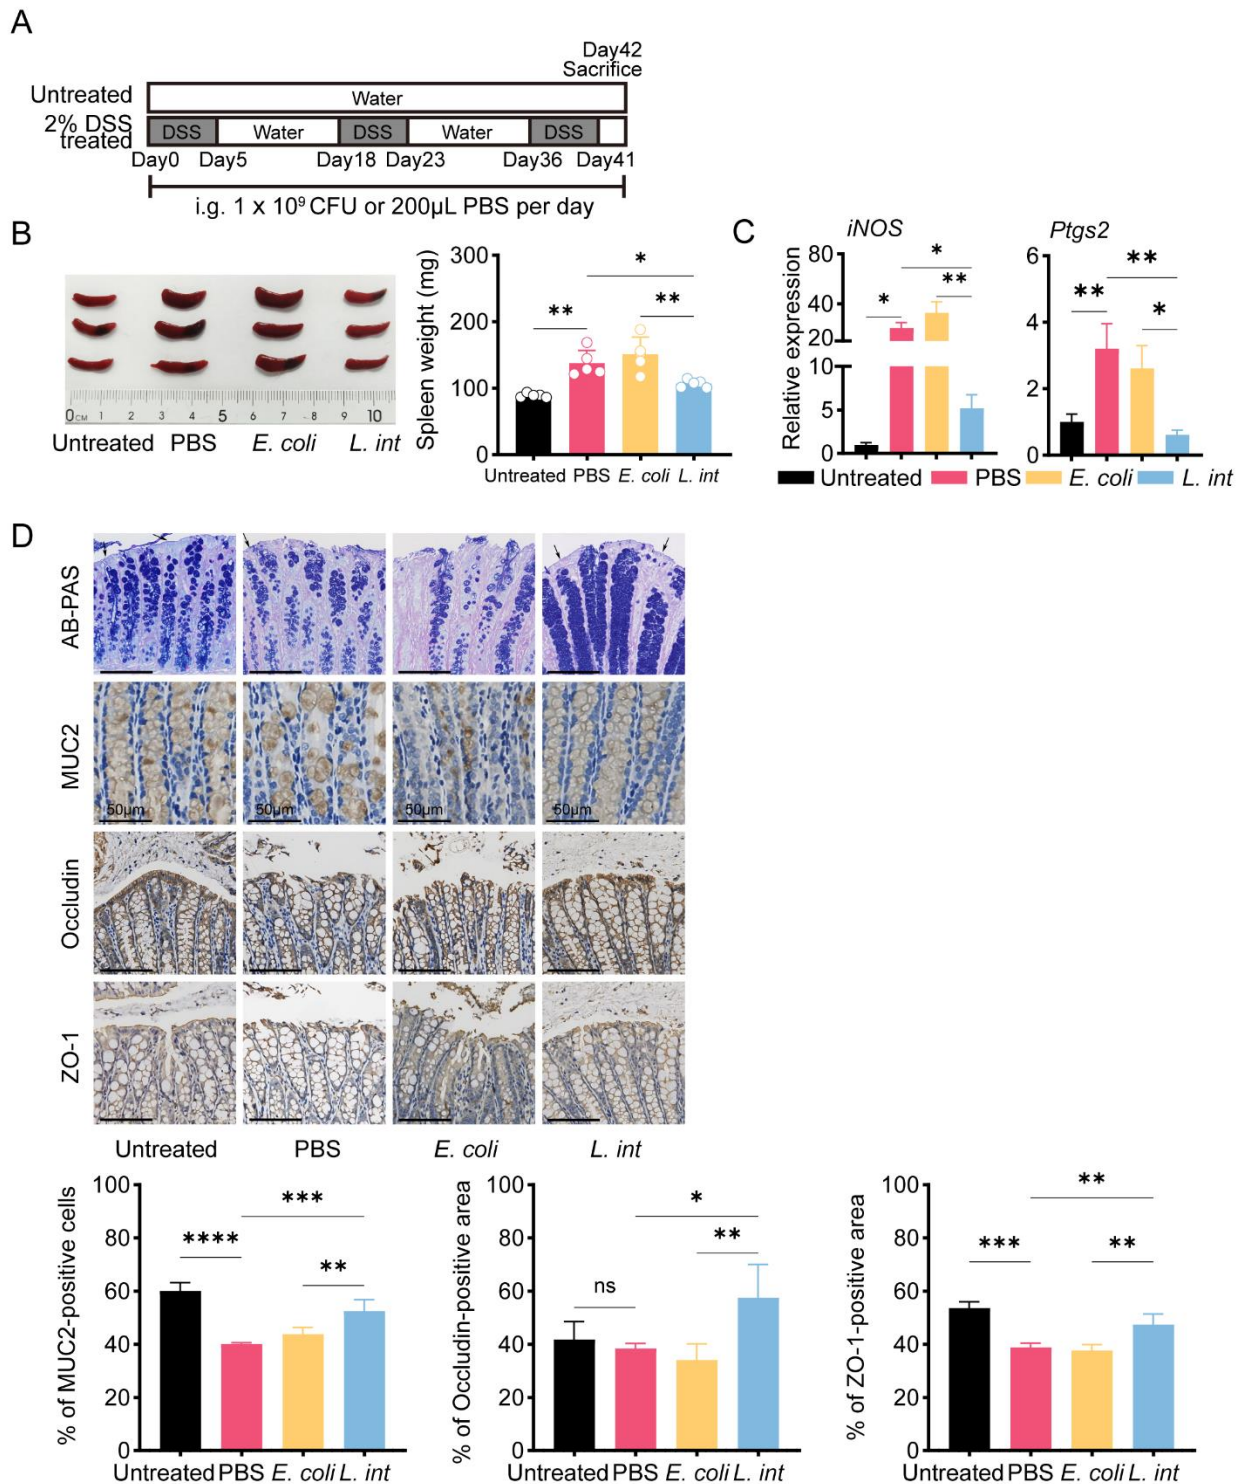

**Figure S1, related to Figure 1. *L. intestinalis* relieved DSS-induced colitis**

**A**, Chronic colitis group mice were treated with 3 cycles of 5-day 2% DSS in drinking water followed by 14-day normal water. Control group mice received normal water during the experiment. **B-D**, spleen size and weight (**B**), and colonic expression of *iNos* and *Ptgs2* (**C**) were compared among mice treated without (Untreated), or with DSS accompanied by PBS, *E. coli*, or *L. intestinalis* (*L. int*) gavage respectively (n = 5). Alcian blue-PAS staining (scale bar, 100  $\mu$ m), and the MUC2 (scale bar, 50  $\mu$ m), Occludin (scale bar, 100  $\mu$ m) and ZO-1 (scale bar, 100  $\mu$ m) immunohistochemistry were used for assessment of mucosal barrier (**D**) (n = 3). Error bars indicate mean  $\pm$  SEM. \* $P < .05$ ; \*\* $P < .01$ ; \*\*\* $P < .001$ ; \*\*\*\* $P < .0001$ .  $P$  values were based on Mann-Whitney test, Kruskal-Wallis with post-hoc test, and one-way ANOVA with post-hoc test.

Figure S2, related to Figure 1

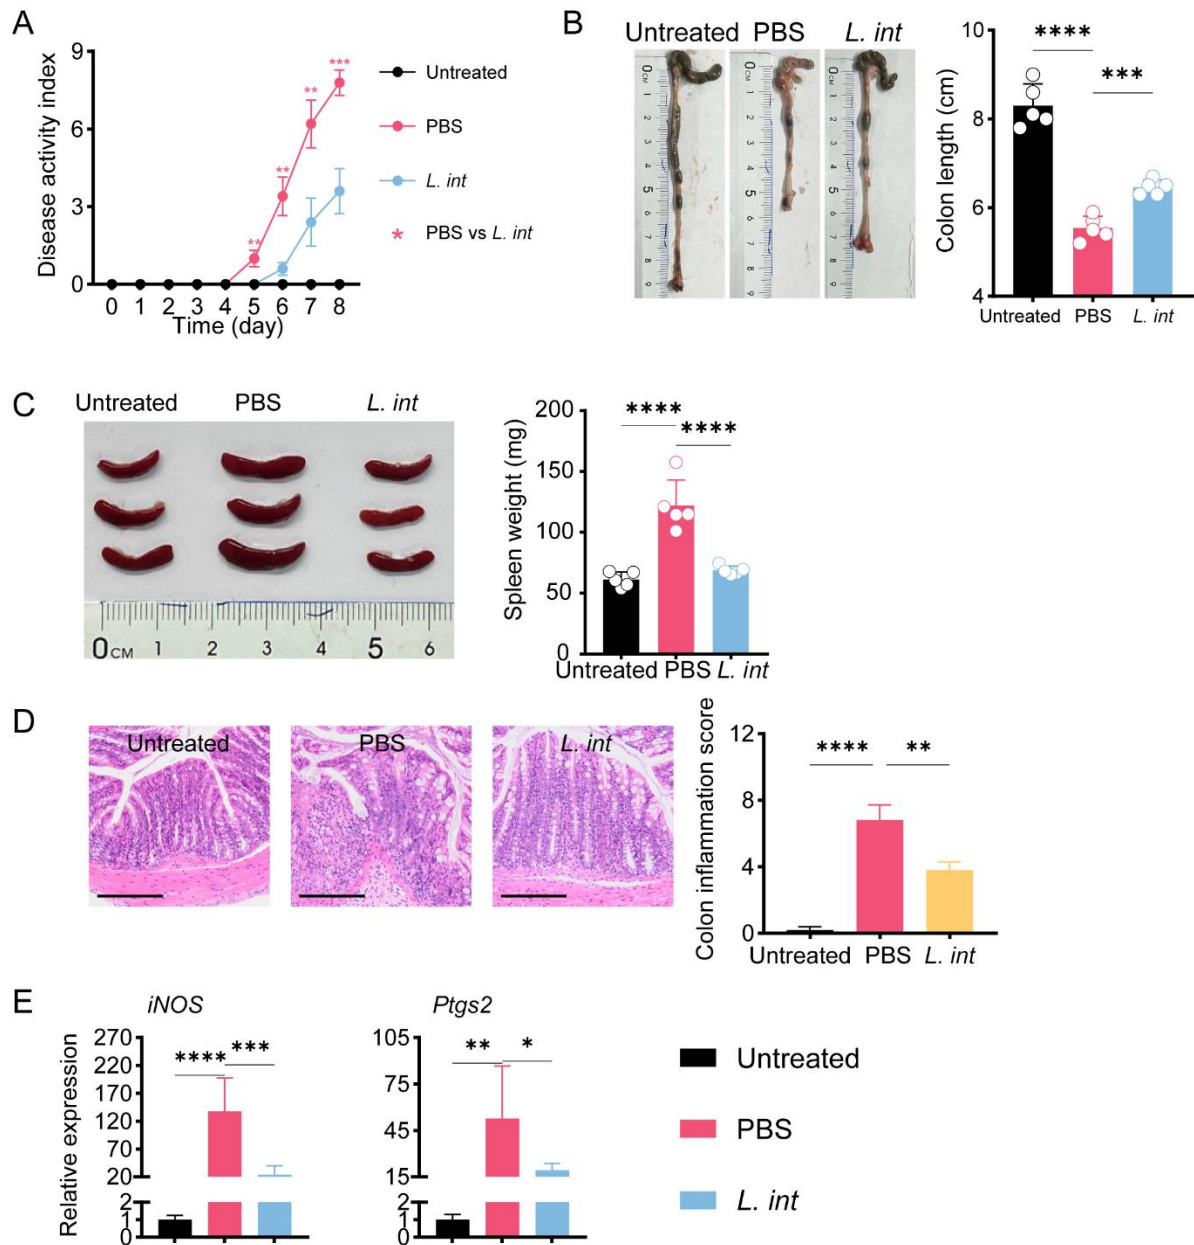

**Figure S2, related to Figure 1. *L. intestinalis* relieved DSS-induced acute colitis**

**A-E**, The pathology of colitis and systemic inflammation was evaluated among control group (Untreated) and the 2 chronic colitis groups with PBS, and *L. intestinalis* (*L. int*) gavage respectively by disease activity index (**A**), colon length (**B**), spleen size and weight (**C**), histological score (scale bar, 200  $\mu$ m) (**D**), and colonic expression of *iNos* and *Ptgs2* (**E**) (n = 5). Error bars indicate mean  $\pm$  SEM. \* $P < .05$ ; \*\* $P < .01$ ; \*\*\* $P < .001$ ; \*\*\*\* $P < .0001$ .  $P$  values were based on one-way ANOVA with post-hoc test.

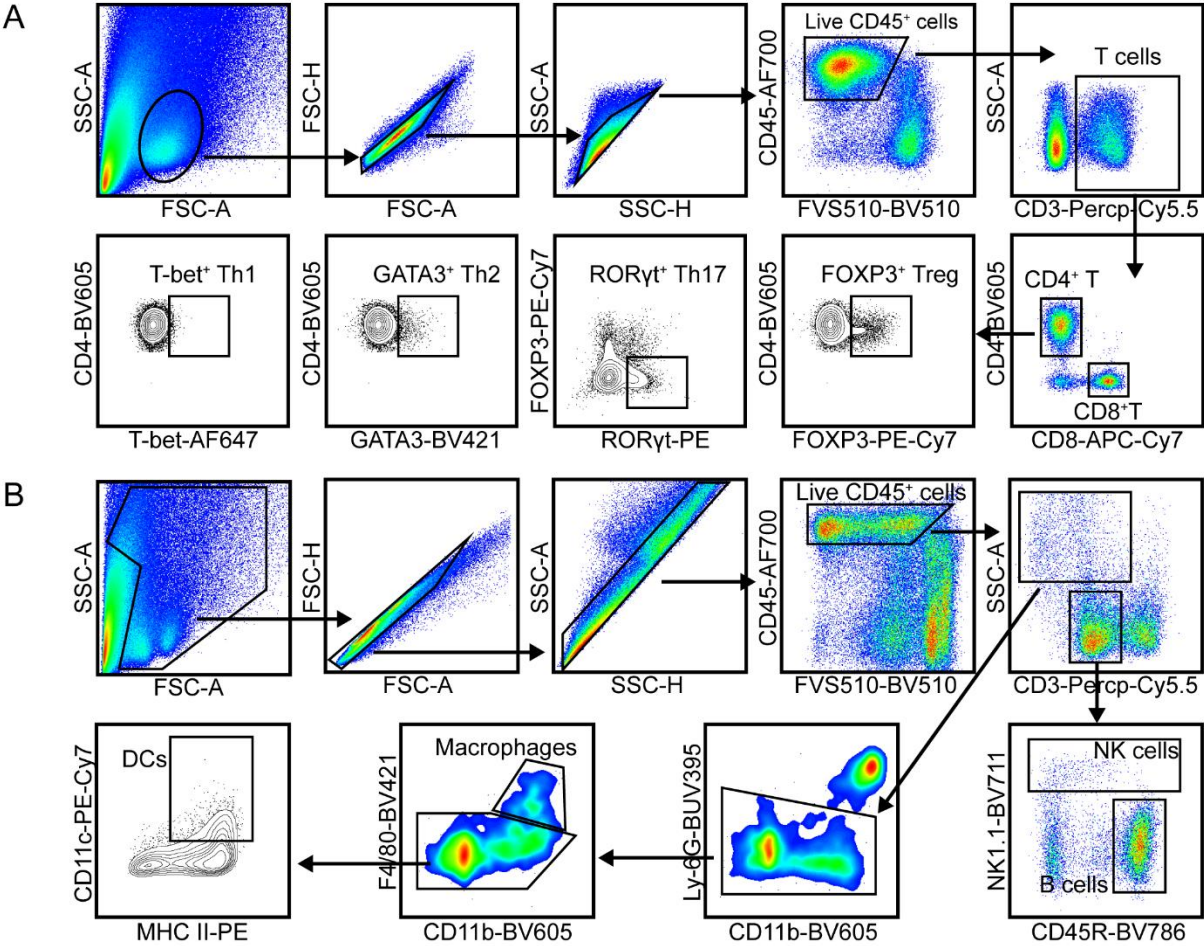

**Figure S3, related to Figure 2. Gating strategy for multicolor flow cytometry**

**A-B,** Gating strategy for multicolor flow cytometry.

Figure S4, related to Figure 2

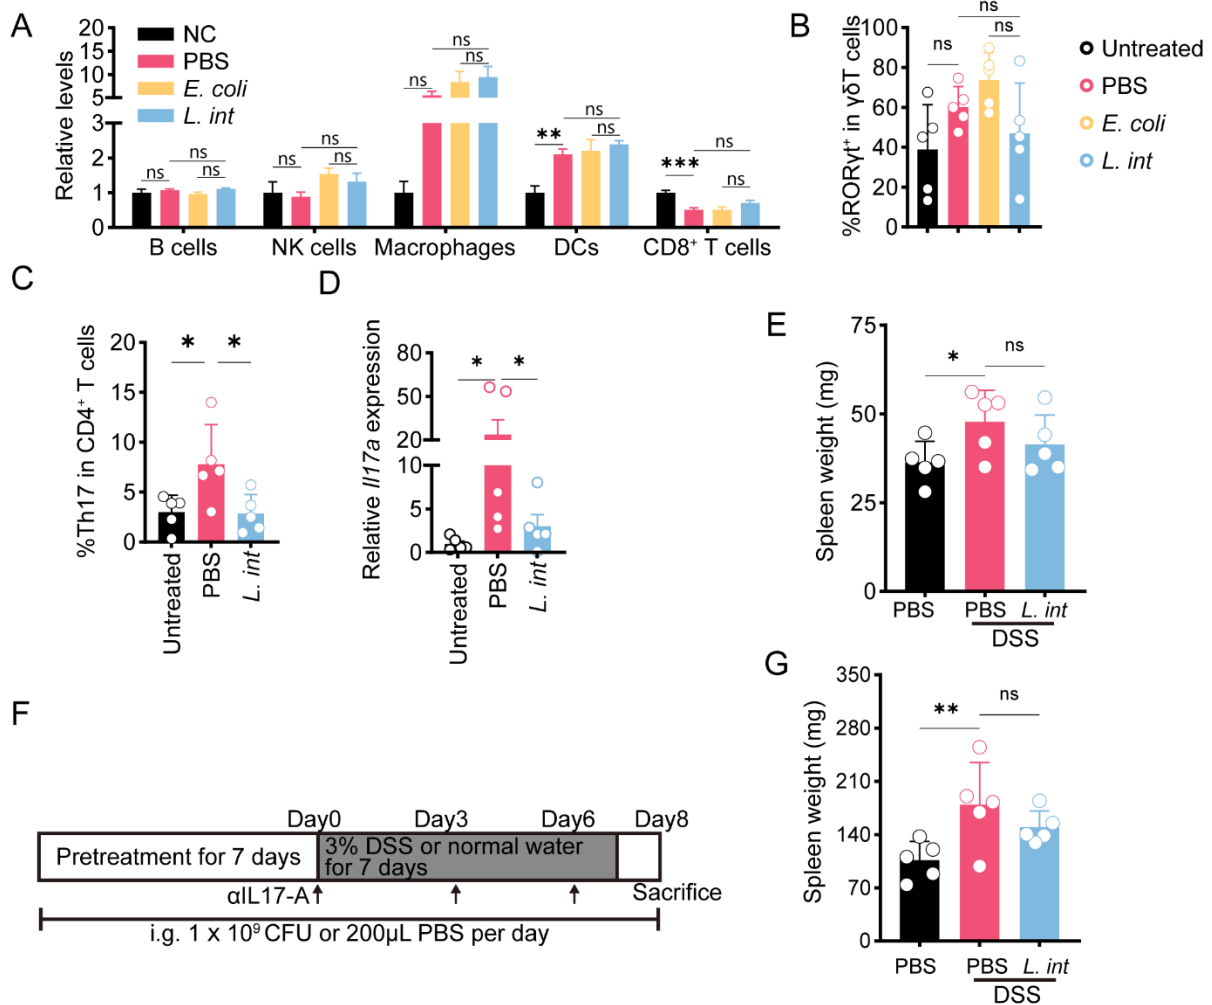

**Figure S4, related to Figure 2. *L. intestinalis* relieved colitis in a Th17-dependent way.**

**A-B**, Related levels of major immune cells (**A**) and frequencies of TCRγδ<sup>+</sup>RORγt<sup>+</sup> T cells (**B**) were tested by multicolor flow cytometry in colon lamina propria of untreated mice and chronic DSS-treated mice with gavage of PBS, *E. coli*, or *L. intestinalis* (*L. int*). **C-D**, Frequencies of Th17 cells in colon lamina propria of untreated mice and acute DSS-treated mice with gavage of PBS or *L. intestinalis* (*L. int*), and *Il17a* expression were performed (**D**). **E**, Spleen weight was compared among untreated *Rag1*<sup>-/-</sup> mice and acute DSS-treated *Rag1*<sup>-/-</sup> mice with gavage of PBS or *L. intestinalis* (*L. int*). **F**, Pretreatment with gavage of PBS or *L. intestinalis* (*L. int*) was started on the 7th day before DSS treatment and until the end of the experiment. Control group (Untreated) received PBS gavage without DSS treatment. On day 0, 3, and 6 of DSS course, all mice were intraperitoneally injected with IL-17A neutralizing antibodies (αIL17-A). **G**, Spleen weight was compared among untreated or acute DSS-treated mice with gavage of PBS or *L. intestinalis* (*L. int*), which all were administrated with αIL17-A. Error bars indicate mean ± SEM. n = 5. ns, no significance; \**P* < .05; \*\**P* < .01; \*\*\**P* < .001. *P* values were based on one-way ANOVA with post-hoc test.

Figure S5, related to Figure 3

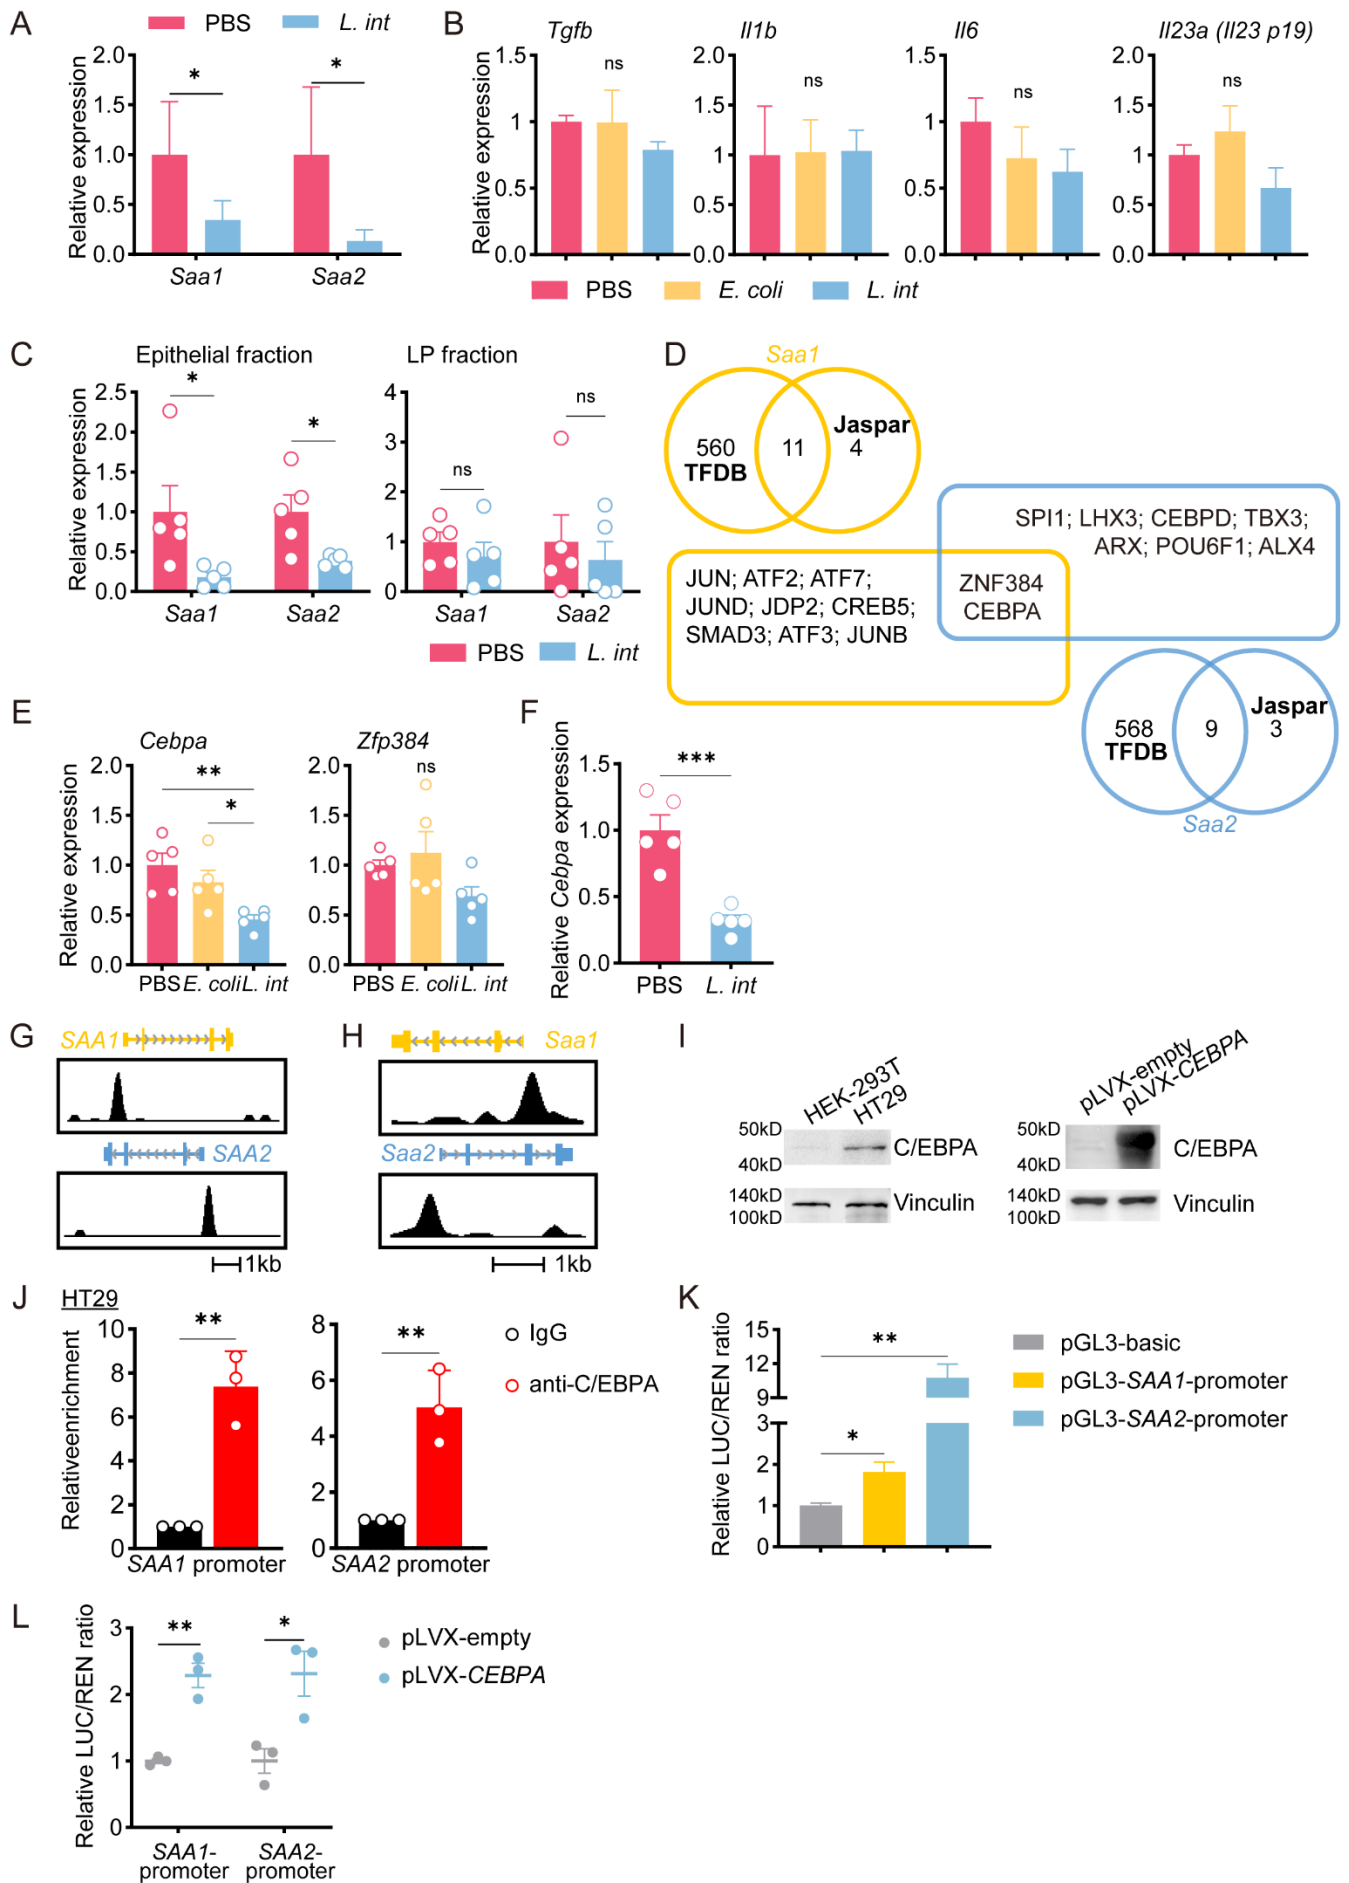

**Figure S5, related to Figure 3. The colonization of *L. intestinalis* induced colonic epithelial SAA1/2 expression via CEBP/A, but did not alter cytokine profiles**

**A**, Expression of *Saa1/2* was evaluated in bulk colon samples from acute DSS-treated mice with gavage of PBS or *L. intestinalis* (*L. int*) (n = 5). **B**, Expression of *Tgfb*, *Il1b*, *Il6* and *Il23a* was evaluated in bulk colon

samples from chronic DSS-treated mice with gavage of PBS, *E. coli* or *L. intestinalis* (*L. int*) (n = 5). **C**, Expression of *Saa1/2* was evaluated in colonic epithelial and lamina propria fractions from acute DSS-treated mice with gavage of PBS and *L. intestinalis* (*L. int*) (n = 5). **D**, The potential transcriptions of *Saa1* and *Saa2* were predicted by JASPAR and TFDB. **E**, Expression levels of *Cebpa* and *Zfp384* were evaluated in bulk colon samples from chronic DSS-treated mice with gavage of PBS, *E. coli*, and *L. intestinalis* (*L. int*) (n = 5). **F**, *Cebpa* expression was evaluated in bulk colon samples from acute DSS-treated mice with gavage of PBS and *L. intestinalis* (*L. int*) (n = 5). **G-H**, C/EBPA binding regions near the transcription start sites of human SAA1/2 (**G**) and mouse *Saa1/2* (**H**) were obtained from Cistrome Data Browser. **I**, The endogenous expression level of C/EBPA in HEK-293T and HT29 was detected by western blot (left). Overexpression of C/EBPA was tested by western blot in HEK-293T (right). **J**, The enrichment at SAA1 and SAA2 promoter was detected by CUT&RUN-qPCR in HT29 cell using anti-C/EBPA or control IgG. **K**, The luciferase activity was tested for the transcription function of SAA1 and SAA2 promoter-driven luciferase reporters. The firefly luciferase (LUC) was driven by SAA1 or SAA2 promoter region. The trans-activation ability of C/EBPA was measured by the LUC / Renilla luciferase (REN) ratio in HEK-293T cells co-transfected with pLVX-empty or pLVX-CEBPA (n = 3). Error bars indicate mean  $\pm$  SEM. ns, no significance; \**P* < .05; \*\**P* < .01; \*\*\**P* < .001. *P* values were based on Student's t test and one-way ANOVA with post-hoc test.



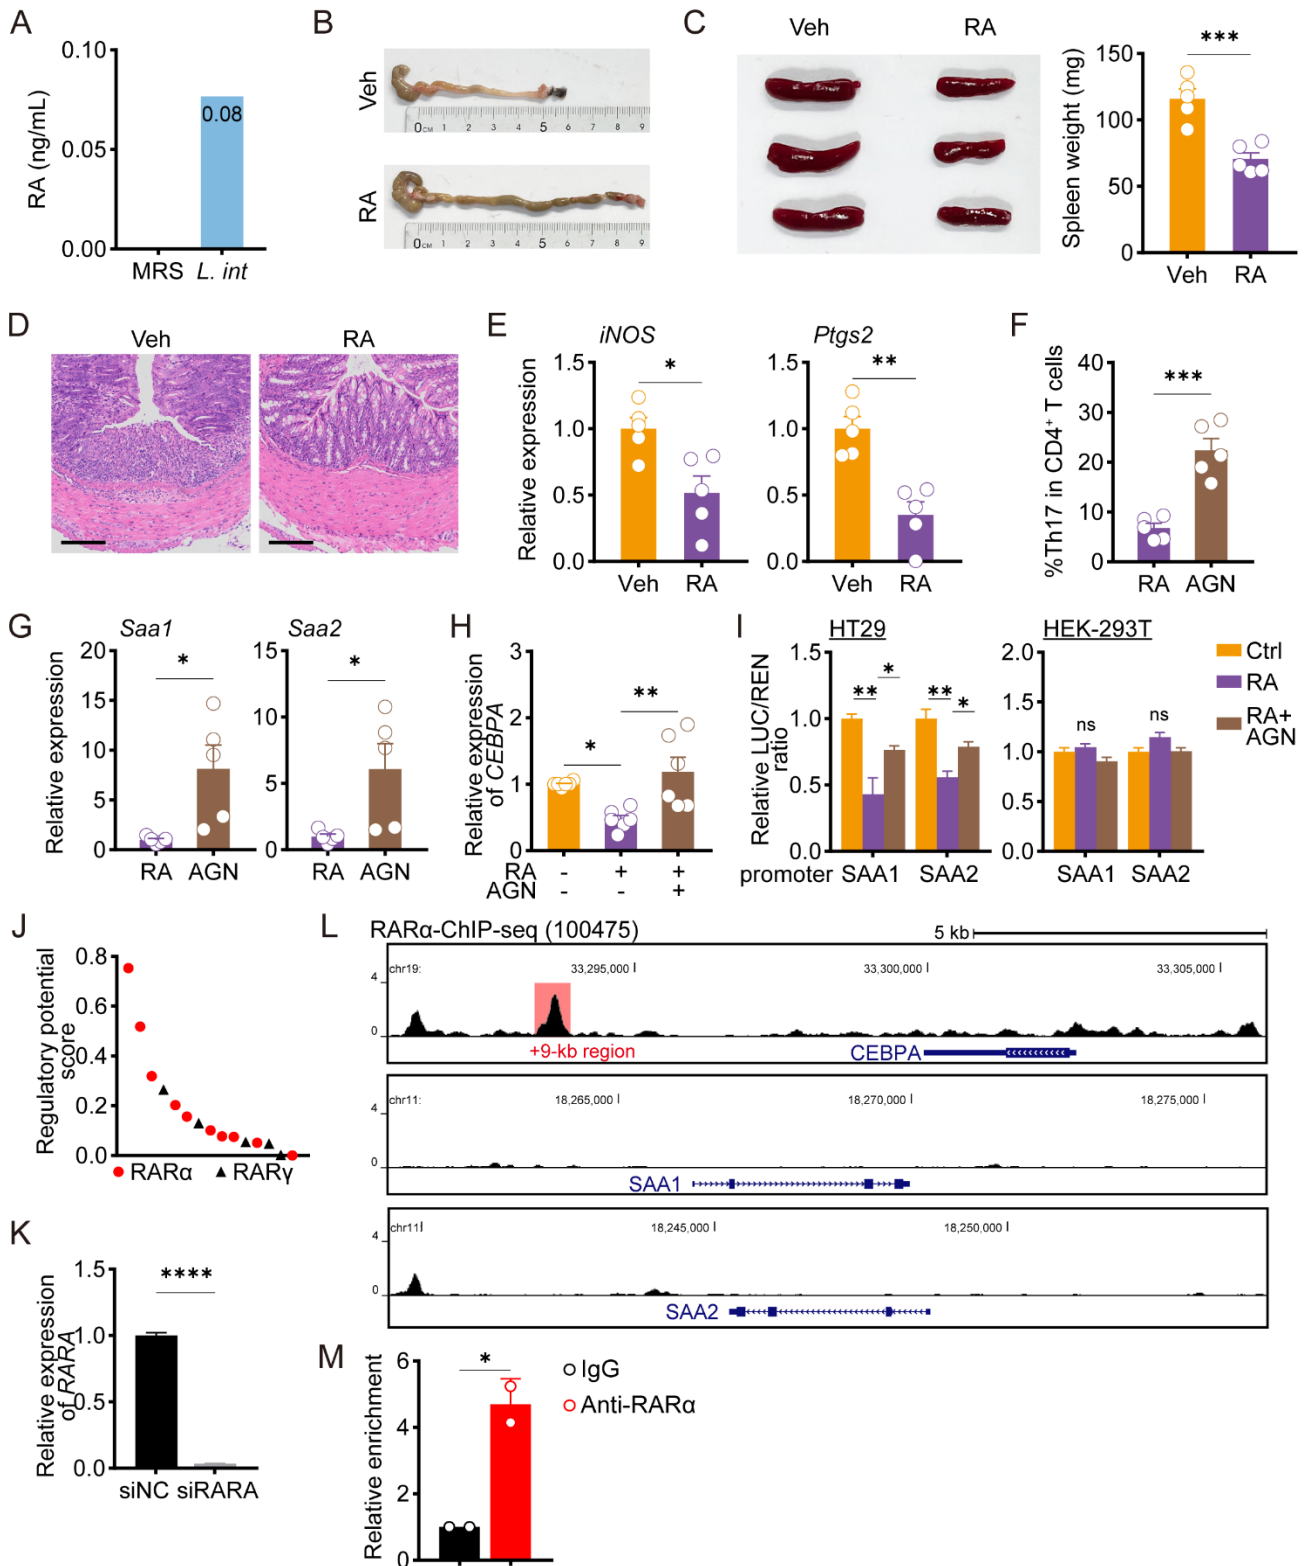

**Figure S6, related to Figure 4. *L. intestinalis* contributed retinoic acid synthesis to relieve colitis.**

**A**, Quantification of retinoic acid (RA) was performed in the MRS media or MRS media incubated with *L. intestinalis* (*L. int*). **B-E**, Representative colon images (**B**), spleen size and weight (**C**), pathology (scale bar, 200  $\mu$ m) (**D**), and colonic expressions of *iNOS* and *Ptgs2* (**E**) were compared between DSS-treated mice with vehicle (Veh) or retinoic acid (RA) gavage (n=5). **F-G**, Frequencies of Th17 cells in colon lamina propria (**F**) and expression of *Saa1/2* (**G**) were compared between DSS-treated mice with retinoic acid (RA) or retinoic acid + AGN193109 (AGN) administration (n=5). **H**, Expression of C/EBPA was tested in HT29 cells treated with RA or AGN (n=6). **I**, The firefly luciferase was driven by *SAA1* or *SAA2* promoters. The LUC / REN ratio was measured in HT29 and HEK-293T cells with treatment of retinoic acid (RA) or retinoic acid receptor antagonist (AGN193109, AGN). **J**, The regulatory potential score of RARs were

obtained from Cistrome Data Browser, spanning a region of ~100 kb from transcription start site of *CEBPA* gene. **K**, Expression of *RARA* was tested in HT29 cells with *RARA* knockdown by siRNA. **L**, *RARA* binding regions in the flanking regions of *CEBPA* were obtained from Cistrome Data Browser. **M**, The enrichment at +9-kb region of *CEBPA* was detected by ChIP-qPCR in HT29 cells using anti-*RAR* $\alpha$  or control IgG. Error bars indicate mean  $\pm$  SEM. ns, no significance; \* $P < .05$ ; \*\* $P < .01$ ; \*\*\* $P < .001$ .  $P$  values were based on Student's t test and one-way ANOVA with post-hoc test.

Figure S7, related to Figure 5

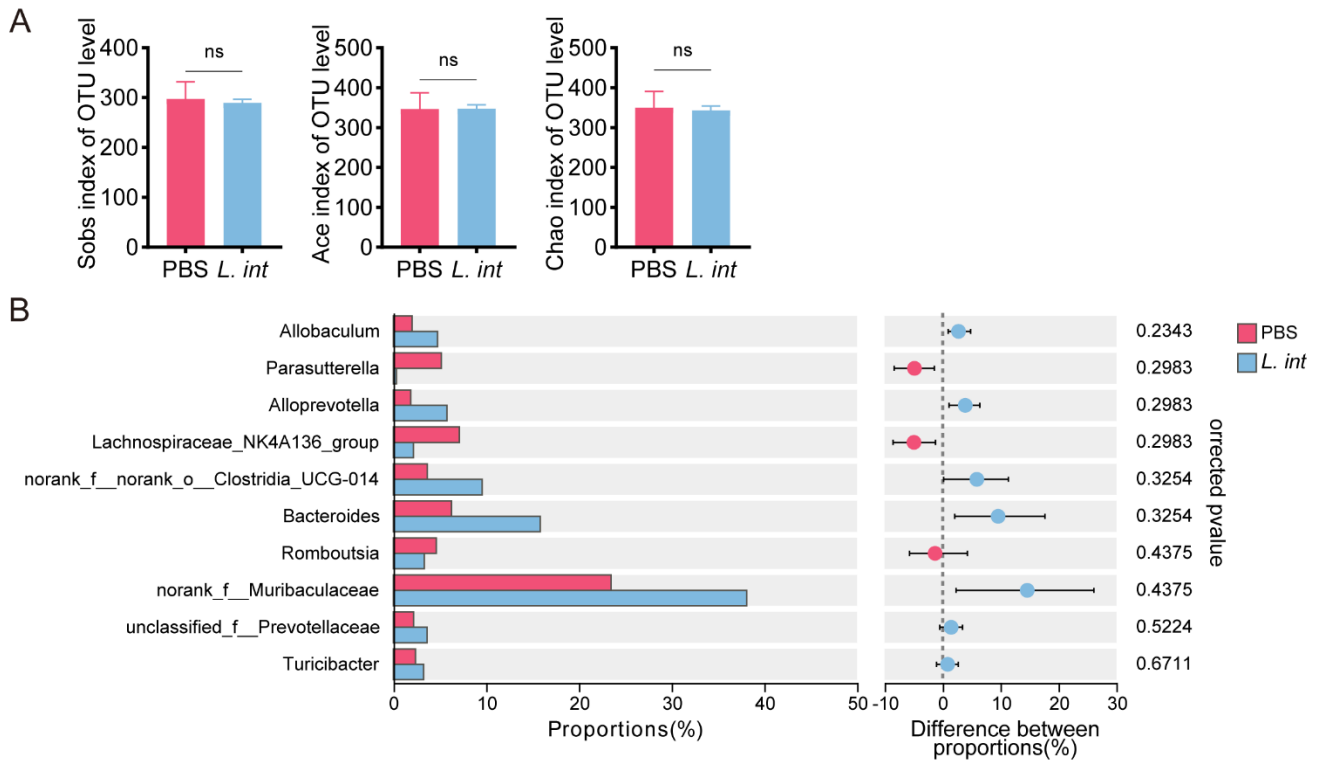

**Figure S7, related to Figure 5. *L. intestinalis* promoted retinoic acid synthesis through its own ALDH and by enhancing host ALDH**

**A**, The  $\alpha$ -diversity of the fecal was compared between chronic DSS-treated mice with PBS gavage and with *L. intestinalis* (*L. int*) gavage (n = 5). **B**, The genus-level taxonomic compositions with top 10 P value were compared between chronic DSS-treated mice with PBS gavage and with *L. intestinalis* (*L. int*) gavage using Wilcoxon rank-sum test with corrected P value.  $P$  values were based on Student's t test and Wilcoxon rank-sum test with corrected P value.

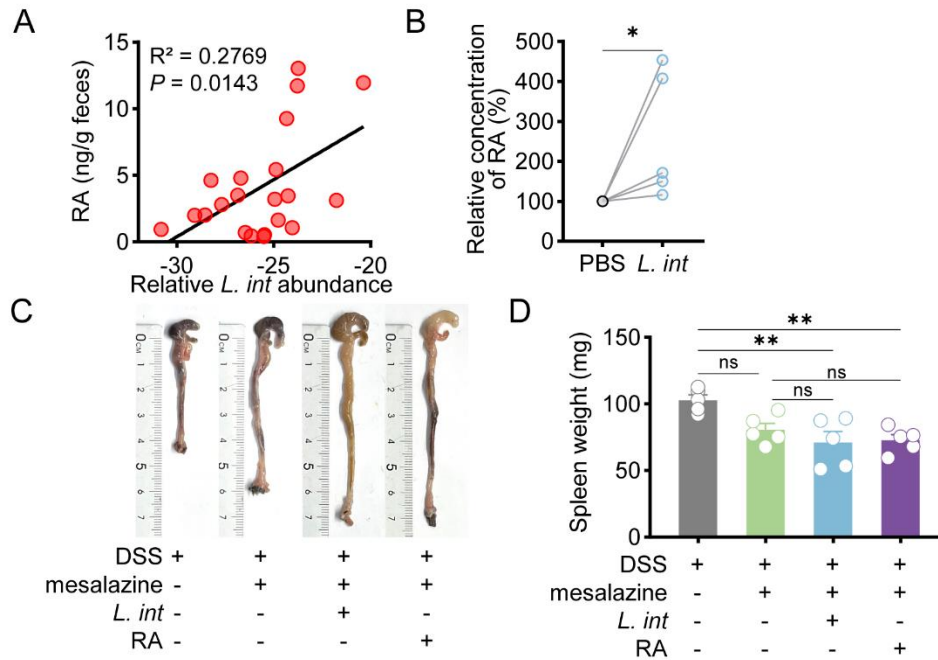

**Figure S8, related to Figure 6. *L. intestinalis* suppressed the CEBP/A-SAA1/2-Th17 axis in UC patients and exerted therapeutic effect on DSS-induced colitis.**

**A**, The correlation analysis was performed in feces from IBD patients to determine the relationship between the retinoic acid (RA) concentration and *L. intestinalis* (*L. int*) abundance. **B**, The relative concentration of RA was measured in supernatant of fecal *in vitro* anaerobic fermentation administrated with or without *L. intestinalis* (*L. int*). **C-D**, Representative colon images (**C**) and spleen size and weight (**D**) were compared DSS-treated mice treated with vehicle (Veh), or mesalazine alone or in combination with *L. intestinalis* (*L. int*) or retinoic acid (RA) (n=5). Error bars indicate mean  $\pm$  SEM. ns no significant; \* $P < .05$ ; \*\* $P < .01$ .  $P$  values were based on Pearson correlation test, ratio paired t test, and one-way ANOVA with post-hoc test.
